# Supplementary material for: Genetic variants in de novo lipogenic pathway genes predict the prognosis of surgically-treated hepatocellular carcinoma
Source: PubMed Central journal article supplement (PMC4379911; doi:10.1038/srep09536), 2015-03-26
Supplement: srep09536-s1.pdf [file srep09536-s1.pdf]

**Genetic variants in de novo lipogenesis pathway genes predict the prognosis of surgical  
hepatocellular carcinoma**

Hequn Jiang<sup>1#</sup>, Jingyao Dai<sup>2#</sup>, Xiaojun huang<sup>3</sup>, Yibing Chen<sup>3</sup>, Ping Qu<sup>3</sup>, Jibin Li<sup>3</sup>, Cheng Yi<sup>1</sup>,  
Yefa Yang<sup>4</sup>, Kejing Zhang<sup>5\*</sup>, Qichao Huang<sup>3\*</sup>

<sup>1</sup>Cancer Center, West China Hospital, Sichuan University, Chengdu, Sichuan 610041, China.

<sup>2</sup>Department of Hepatobiliary Surgery, Xijing Hospital, Fourth Military Medical University,  
Xi'an, 710032, China.

<sup>3</sup>State Key Laboratory of Cancer Biology and Experimental Teaching Center of Basic  
Medicine, Fourth Military Medical University, Xi'an, 710032, China.

<sup>4</sup>Department of Interventional Radiology, Eastern Hepatobiliary Surgery Hospital,  
Second Military Medical University, Shanghai, 200438, China.

<sup>5</sup>College of Life Science, Northwest University, Xi'an, 710069, China.

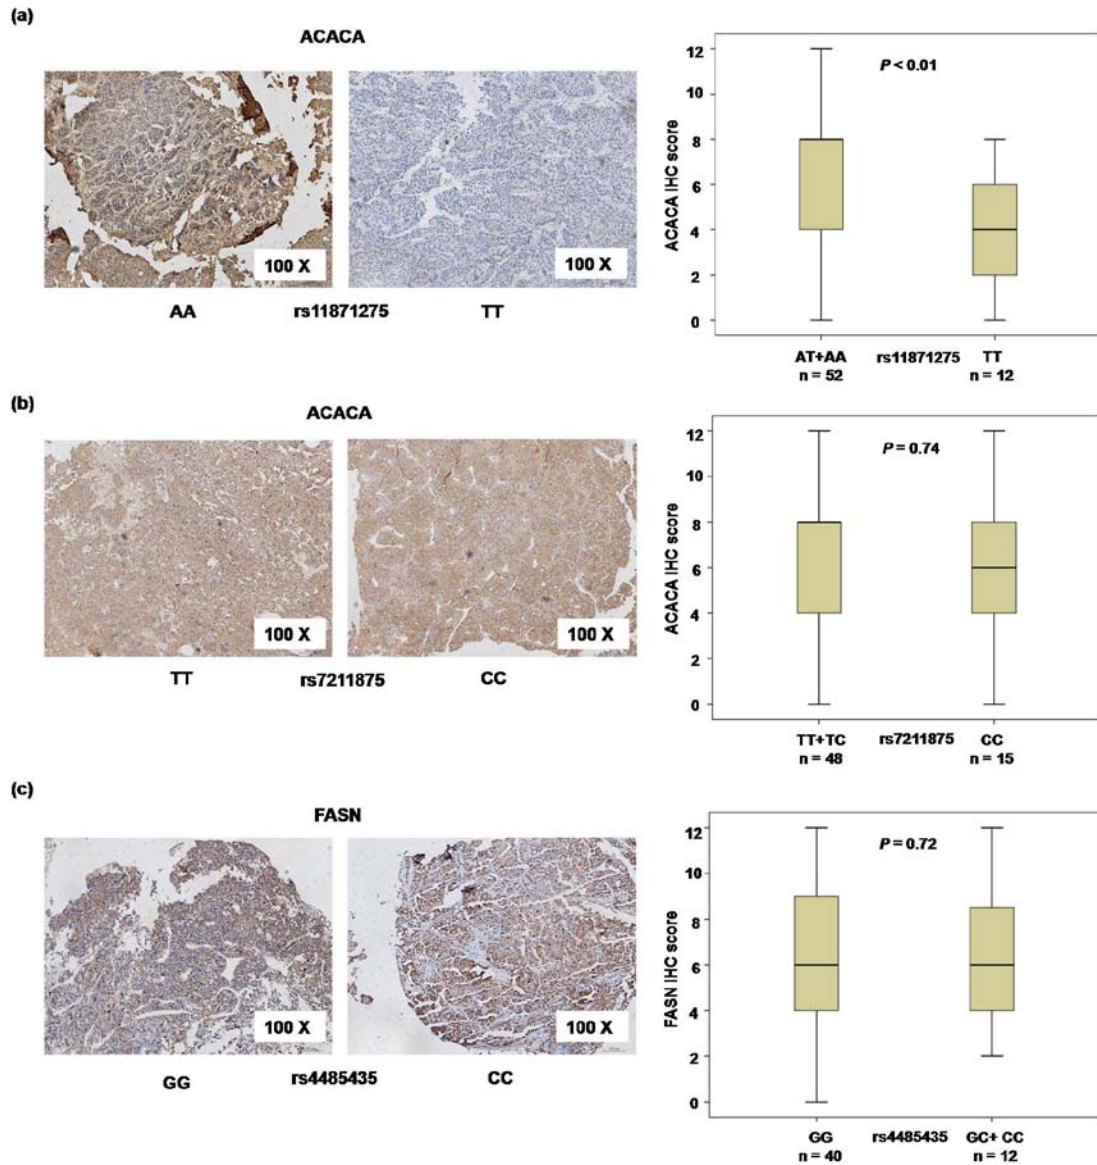

Supplementary figure 1. The relationship between SNP genotypes and the expression of ACACA and FASN in HCC tissue. (a) Immunohistochemical staining of ACACA and relationship between SNP rs11871275 genotypes and ACACA. (b) Immunohistochemical staining of ACACA and relationship between SNP rs7211875 genotypes and ACACA. (c) Immunohistochemical staining of FASN and relationship between SNP rs4485435 genotypes and FASN.

Supplementary Table 1. The basic information of targeted genes and their SNPs

| Genes        | SNPs                   | Allele | Functional analysis          | Location /position (GRCh 37)        |
|--------------|------------------------|--------|------------------------------|-------------------------------------|
| <i>ACACA</i> | rs1714987 <sup>a</sup> | C/G    | nsSNP/Splicing (ESE or ESS)  | Intron ( <i>ACACA</i> ) /17: 357430 |
|              | rs11871275             | A/T    | TFBS                         | Intron /17: 35769089                |
|              | rs7211875              | T/C    | Missense SNP (P[pro]>S[ser]) | Exon /17: 35771468                  |
| <i>ACLY</i>  | rs2304497              | T/G    | Missense SNP (E[Glu]>D[Asp]) | Exon /17:40065774                   |
|              | rs9912300              | G/T    | TFBS                         | Intron /17: 40025264                |
| <i>FASN</i>  | rs4246444              | G/T    | NA                           | Intron /17:80038952                 |
|              | rs1140616              | C/T    | SynSNP                       | Exon /17:80039481                   |
|              | rs4485435              | G/C    | SynSNP                       | Exon /17:80045086                   |
|              | rs11653012             | G/A    | TFBS                         | 3' UTR /17: 80058857                |

Abbreviations: *ACACA*, Acetyl- CoA carboxylase- alpha; *ACLY*, ATP citrate lyase; *FASN*, Fatty acid synthetase; SNP, single nucleotide polymorphisms; nsSNP, non-synonymous SNP; TFBS, transcription factor binding site; SynSNP, synonymous SNP; NA, no information.

<sup>a</sup> GeneView data set indicated that rs1714987 was also a missense SNP in *C17orf78* gene.

<sup>b</sup> Genome Reference Consortium Human Build 37.5.
